# Supplementary material
Source: PubMed Central journal article supplement (PMC7016913)
Supplement: ao9b02697_si_001.pdf [file ao9b02697_si_001.pdf]

## **SUPPORTING INFORMATION.**

### **Computational Analysis of Crystallization Additives for the Identification of New Allosteric Sites**

Jade Fogha<sup>1</sup>, Julien Diharce<sup>1</sup>, Alan Obled<sup>1</sup>, Samia Aci-Sèche<sup>1</sup>, Pascal Bonnet<sup>1\*</sup>.

<sup>1</sup> Institut de Chimie Organique et Analytique, Université d'Orléans, UMR CNRS 7311, BP6759, 45067 Orléans, Cedex 2, France.

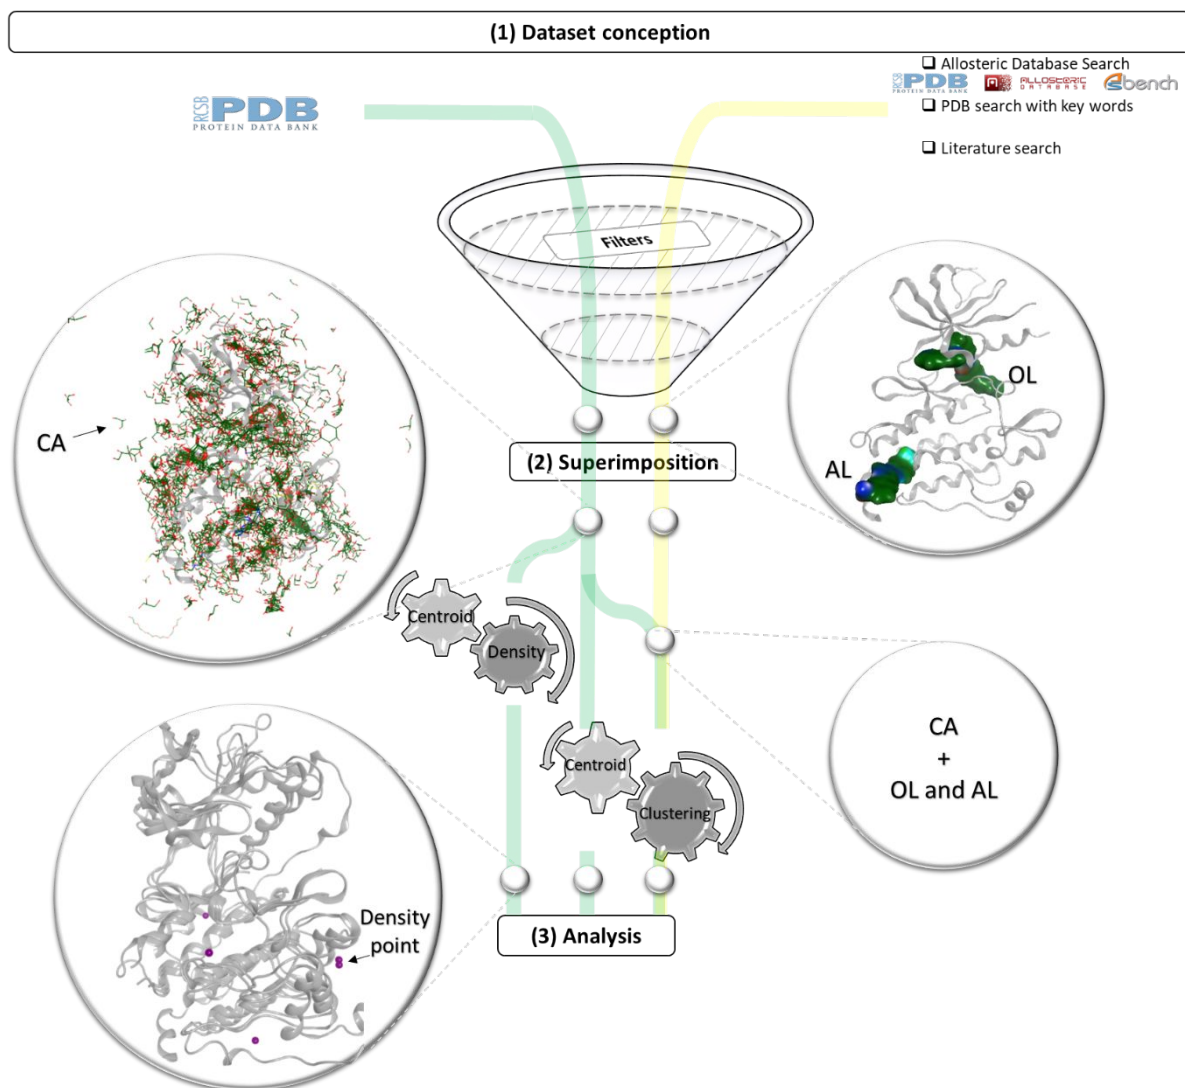

**Figure S1.** General workflow used in the study. For a given protein family (protein kinases or nuclear receptors), the process is divided in three main steps (1) conception of the two datasets (CA in green line and AL + OL in yellow line), (2) superimposition of the datasets on a reference protein, (3) clustering and density analysis. CA represent crystallographic additives, OL orthosteric ligands and AL allosteric ligands.

**Table S1.** List of crystallographic additives retrieved in the crystallographic structures of protein kinases and nuclear receptors and considered in the CA dataset.

|                                                                                                           |                                                                                     |                             |                                                                                      |
|-----------------------------------------------------------------------------------------------------------|-------------------------------------------------------------------------------------|-----------------------------|--------------------------------------------------------------------------------------|
| <p>(2s)-1-[3-{{(2r)-2-hydroxypropyl}oxy}-2,2-bis({(2r)-2-hydroxypropyl}oxy)methyl}propoxy]propan-2-ol</p> | 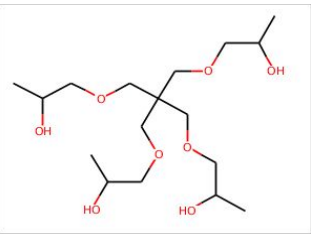   | <p>beta-mercaptoethanol</p> |    |
| <p>(4s)-2-methyl-2,4-pentanediol</p>                                                                      |    | <p>hexaethylene glycol</p>  |    |
| <p>(4s,5s)-1,2-dithiane-4,5-diol</p>                                                                      |   | <p>isopropyl alcohol</p>    |  |
| <p>(r,r)-2,3-butanediol</p>                                                                               |  | <p>monothioglycerol</p>     |  |
| <p>1,3-propanediol</p>                                                                                    |  | <p>triethylene glycol</p>   |  |

|                                                                                                                  |                                                                                     |                                             |                                                                                      |
|------------------------------------------------------------------------------------------------------------------|-------------------------------------------------------------------------------------|---------------------------------------------|--------------------------------------------------------------------------------------|
| <p><b>1-ethoxy-2-(2-ethoxyethoxy)ethane</b></p>                                                                  |    | <p><b>maltose</b></p>                       |    |
| <p><b>2-butanol</b></p>                                                                                          |    | <p><b>glycerol</b></p>                      |    |
| <p><b>(2s)-1-[3-{{(2r)-2-hydroxypropyl}oxy}-2,2-bis({(2r)-2-hydroxypropyl}oxy)methyl}propoxy]propan-2-ol</b></p> |    | <p><b>heptyl-beta-d-glucopyranoside</b></p> |   |
| <p><b>1,2-ethanediol</b></p>                                                                                     |  | <p><b>hexane-1,6-diol</b></p>               |  |
| <p><b>1-butanol</b></p>                                                                                          |  | <p><b>hexyl beta-d-glucopyranoside</b></p>  |  |
| <p><b>2,3-dihydroxy-1,4-dithiobutane</b></p>                                                                     |  | <p><b>dodecyl-alpha-d-maltoside</b></p>     |  |

|                                                                                                   |                                                                                    |                             |                                                                                    |
|---------------------------------------------------------------------------------------------------|------------------------------------------------------------------------------------|-----------------------------|------------------------------------------------------------------------------------|
| <p>2-{2-[2-(2-{2-[2-(2-ethoxy-ethoxy)-ethoxy]-ethoxy)-ethoxy]-ethoxy}-ethoxy]-ethoxy}-ethanol</p> |   | <p>pentaethylene glycol</p> |  |
| <p>2-amino-2-hydroxymethylpropane-1,3-diol</p>                                                    |   | <p>s-1,2-propanediol</p>    |  |
| <p><math>\beta</math>-octylglucoside</p>                                                          |  |                             |                                                                                    |

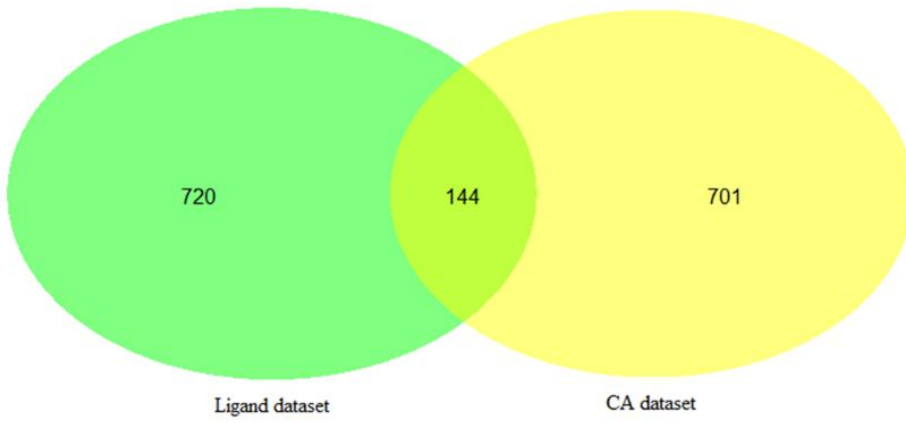

**Figure S2.** Datasets representation by Venn diagram in terms of PDB files of protein kinases.

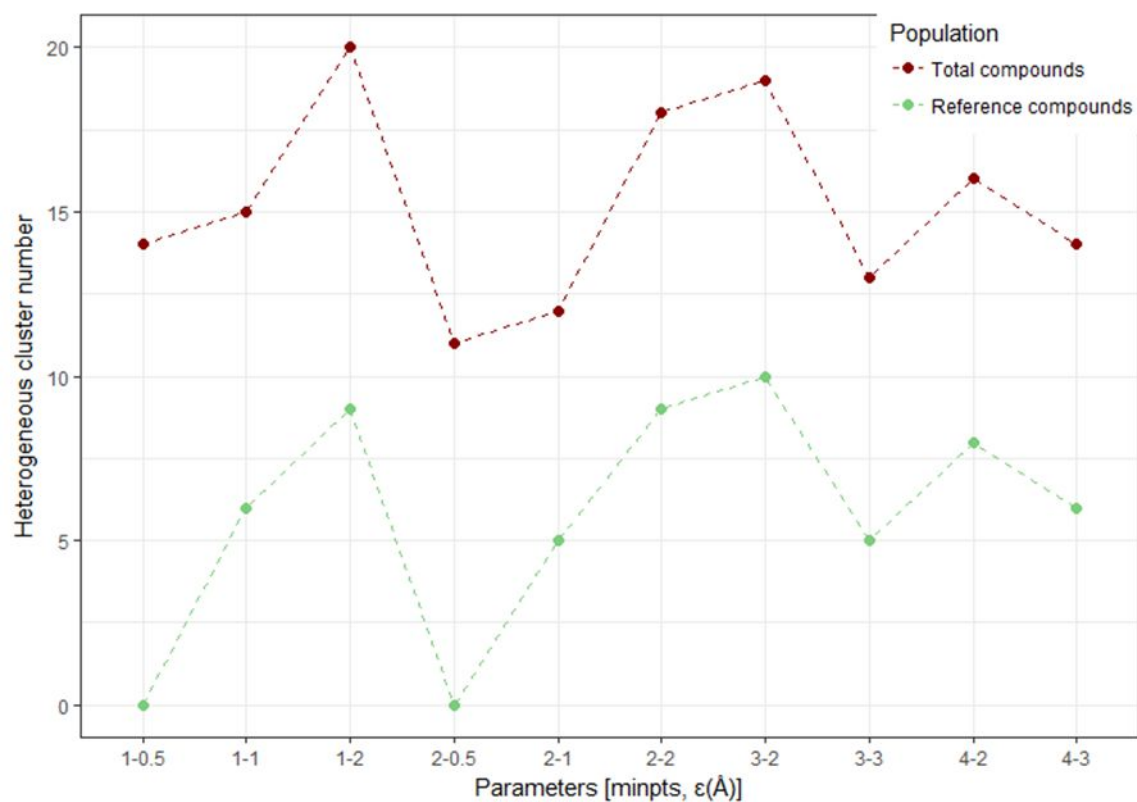

**Figure S3.** Cluster population evaluation in function of the different couples of parameters formed by the distance between two points in a cluster ( $\epsilon$  in  $\text{\AA}$ ) and the minimal number of points to form a cluster (minpts) for protein kinases.

**Table S2.** Position of the 18 reference allosteric ligands of protein kinases after the clustering procedure with different couples of parameters. Red color represents homogeneous clusters or singletons (associated with “S”) having a wrong prediction. Green color represented heterogeneous clusters (crystallization additives and ligands) having a good prediction. Yellow correspond to heterogeneous clusters related to orthosteric site having a wrong prediction.

|                                    | DEF pocket           |             |             | Back Pocket  |            |            |            |              |             | Myristate pocket |            |            | PIF pocket  |             | Substrat pocket |             | P-loop pocket |                          |
|------------------------------------|----------------------|-------------|-------------|--------------|------------|------------|------------|--------------|-------------|------------------|------------|------------|-------------|-------------|-----------------|-------------|---------------|--------------------------|
| [minpts - $\epsilon(\text{\AA})$ ] | 4E6C (p38 $\alpha$ ) | 3O2M (JNK1) | 3O96 (AKT1) | 3LW0 (IGFIR) | 1S9J (MEK) | 4LMN (MEK) | 3EQC (MEK) | 4ITH (RIPK1) | 4ZJI (PAK1) | 3MS9 (ABL)       | 3K5V (ABL) | 3PYY (ABL) | 3PXF (CDK2) | 3HRF (PDK1) | 3JVR (CHK1)     | 3F9N (CHK1) | 3H30 (CK2a1)  | 4CFE (AMPK $\alpha$ 1/2) |
| 2 - 0.5                            | S                    | S           | S           | S            | 12         | 145        | 12         | S            | S           | S                | S          | S          | 93          | 45          | S               | S           | S             | S                        |
| 1 - 2                              | 32                   | 115         | 0           | 0            | 0          | 0          | 0          | 0            | 0           | 259              | 18         | 259        | 77          | 10          | 261             | 1           | 6             | 96                       |
| 1 - 1                              | 28                   | S           | S           | 0            | 0          | 0          | 0          | 24           | S           | S                | 49         | S          | 117         | 21          | 323             | 263         | S             | 93                       |
| 2 - 2                              | 32                   | 115         | 0           | 0            | 0          | 0          | 0          | 0            | 0           | S                | 18         | S          | 77          | 10          | S               | 1           | 6             | 95                       |
| 2 - 1                              | 28                   | S           | S           | S            | 0          | 0          | 0          | 24           | S           | S                | 49         | S          | 117         | 21          | S               | S           | S             | 93                       |
| 3 - 2                              | 34                   | 117         | 18          | S            | 0          | 0          | 0          | 0            | 0           | S                | 19         | S          | 78          | 9           | S               | 1           | 6             | 93                       |
| 1 - 0.5                            | S                    | S           | S           | S            | 12         | 145        | 12         | S            | S           | S                | S          | S          | 93          | 45          | 298             | S           | S             | S                        |
| 3 - 3                              | 9                    | 16          | 0           | 0            | 0          | 0          | 0          | 0            | 0           | 6                | 6          | 6          | 4           | 4           | 0               | 0           | 0             | 0                        |
| 4 - 3                              | 11                   | 51          | 0           | 0            | 0          | 0          | 0          | 0            | 0           | 7                | 7          | 7          | 6           | 6           | S               | 0           | 5             | 5                        |
| 4 - 2                              | 34                   | S           | 69          | S            | 0          | 0          | 0          | 0            | 0           | S                | 18         | S          | 77          | 7           | S               | 1           | 8             | 0                        |
| 1 - 2 <sup>a</sup>                 | 35                   | 118         | 0           | 0            | 0          | 0          | 0          | 0            | 0           | 263              | 19         | 263        | 80          | 10          | 265             | 1           | 6             | 99                       |
| 3 - 2 <sup>a</sup>                 | 37                   | 120         | 19          | S            | 0          | 0          | 0          | 0            | 0           | S                | 20         | S          | 82          | 9           | S               | 1           | 6             | 96                       |

<sup>a</sup> clustering performed without orthosteric ligand extracted using a pharmacophore search.



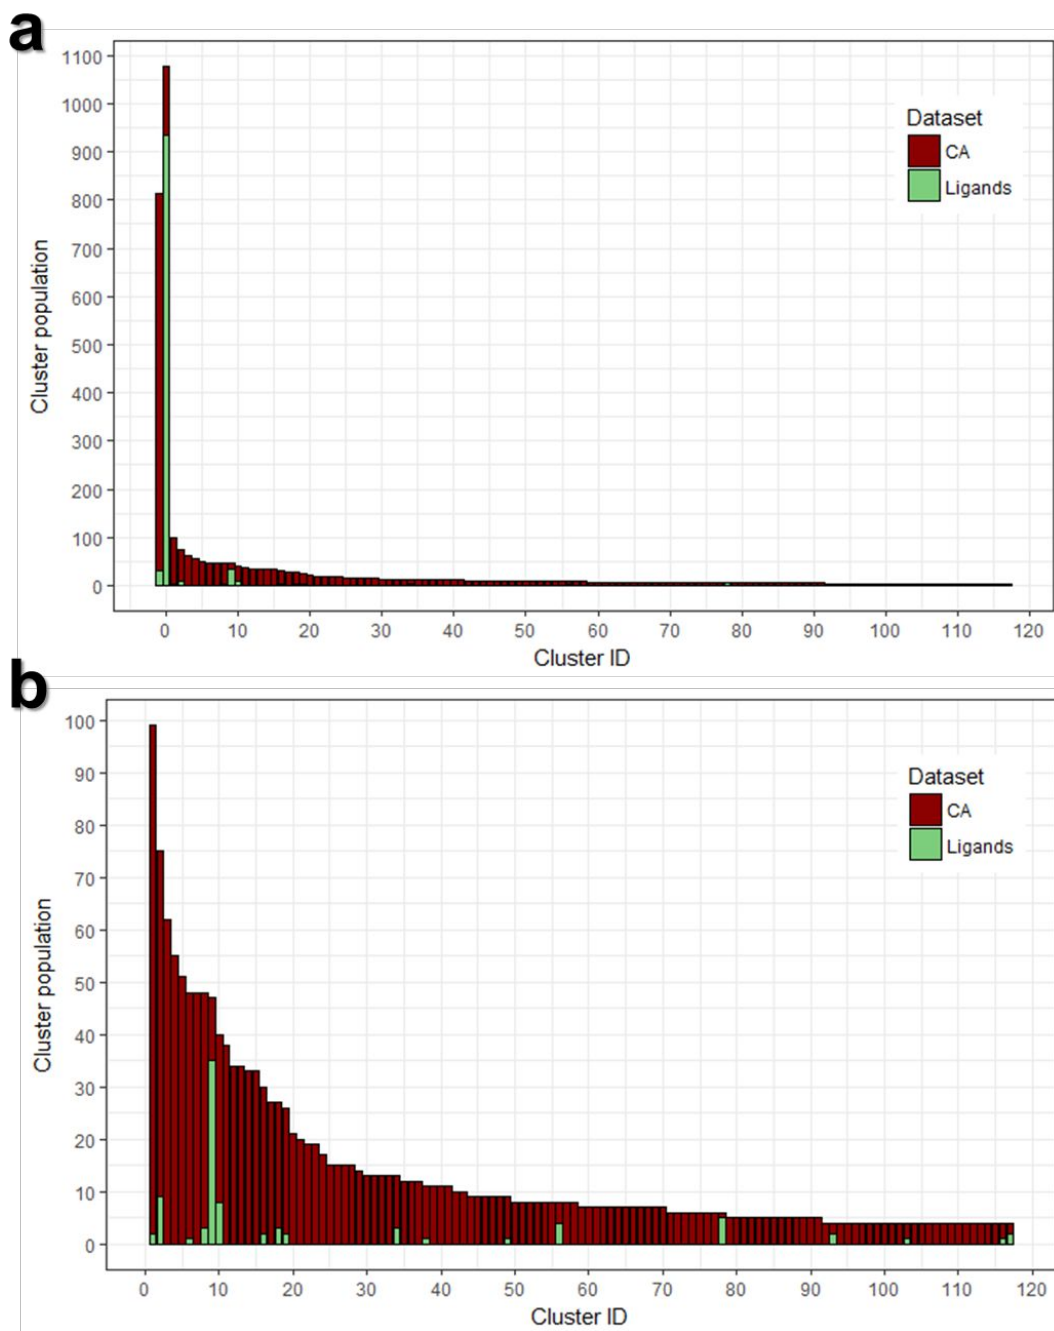

**Figure S4.** Clustering results with the couple of parameters [3 – 2] for protein kinases, ranked by their population. The singletons (cluster ID -1) and the different clusters are represented in (a), the singletons and cluster 0 (orthosteric identifier) are removed in (b). CA are crystallization additives.
